# Supplementary material for: IMPACT CKD: Holistic Disease Model Projecting 10-Year Population Burdens
Source: PubMed Central journal article supplement — Kidney Int Rep. 2024 Aug 20;9(11):3156–66. doi: 10.1016/j.ekir.2024.08.015 (PMC11551131; doi:10.1016/j.ekir.2024.08.015), 2024-08-20
Supplement: mmc1.pdf [file mmc1.pdf]

# Supplemental Materials

## Table of Contents

|                                                                                                                                                      |    |
|------------------------------------------------------------------------------------------------------------------------------------------------------|----|
| Validation and Calibration for IMPACT CKD Model.....                                                                                                 | 3  |
| Model Inputs.....                                                                                                                                    | 4  |
| Supplemental Table S1: CKD stage as defined by eGFR and UACR.....                                                                                    | 4  |
| Supplemental Table S2: eGFR equations for CKD progressors .....                                                                                      | 5  |
| Supplemental Table S3: Key Model Assumptions .....                                                                                                   | 6  |
| Supplemental Table S4: Validation targets and input parameters subject to calibration .....                                                          | 8  |
| Supplemental Table S5: Kidney transplantation model inputs .....                                                                                     | 10 |
| Supplemental Table S6: Dialysis model inputs – Percentage of eligible patients by eGFR.....                                                          | 10 |
| Supplemental Table S7: Dialysis model inputs – Percentage of eligible patients that receive conventional kidney supportive care by age and eGFR..... | 11 |
| Supplemental Table S8: Event risk – Annual probabilities of MI for the general UK population by age and sex.....                                     | 11 |
| Supplemental Table S9: Event risk – Annual probabilities of stroke/TIA for the general UK population by age and sex.....                             | 11 |
| Supplemental Table S10: Event risk – Annual probabilities of AKI for the general UK population by age .....                                          | 11 |
| Supplemental Table S11: Event risk – Annual probabilities of HF resulting in hospitalization for the general UK population by age.....               | 12 |
| Supplemental Table S12: Event risk – CKD-specific relative risk of MI by CKD stage and age .....                                                     | 12 |
| Supplemental Table S13: Event risk – CKD-specific hazard ratios for incidence of stroke by eGFR and UACR status .....                                | 12 |
| Supplemental Table S14: Event risk – CKD-specific relative risk of AKI by CKD stage and age .....                                                    | 13 |
| Supplemental Table S15: Event risk – CKD-specific rate ratios of hospitalization due to HF by CKD category .....                                     | 13 |
| Supplemental Table S16: Event risk – Outcomes of AKI .....                                                                                           | 13 |
| Supplemental Table S17: Relative risk of all-cause mortality by CKD Stage.....                                                                       | 14 |
| Supplemental Table S18: Mortality – Probability of patient survival by transplant type .....                                                         | 14 |
| Supplemental Table S19: Dialysis mortality – Probability of patient mortality by age .....                                                           | 14 |
| Supplemental Table S20: Mortality – Probability of patient mortality from clinical events.....                                                       | 15 |
| Supplemental Table S21: Mortality rates (qx), males and females, UK, 2018-2020.....                                                                  | 16 |
| Supplemental Table S22: Comorbidities risk – Annual probabilities of T2DM for the general UK population by age.....                                  | 18 |

|                                                                                                                                                                   |    |
|-------------------------------------------------------------------------------------------------------------------------------------------------------------------|----|
| Supplemental Table S23: Comorbidities risk – Annual probabilities of HTN for the general UK population by age and sex.....                                        | 18 |
| Supplemental Table S24: Comorbidities risk – Annual probabilities of HF for the general UK population by age and sex.....                                         | 19 |
| Supplemental Table S25: Comorbidities risk – CKD-specific relative risk of T2DM by CKD stage and age .....                                                        | 19 |
| Supplemental Table S26: Comorbidities risk – CKD-specific relative risk of HF by CKD stage and age ..                                                             | 19 |
| Supplemental Table S27: Comorbidities risk – CKD-specific relative risk of HTN by CKD stage and age                                                               | 20 |
| Supplemental Table S28: Annual resource burden associated with CKD.....                                                                                           | 20 |
| Supplemental Table S29: Annual per patient costs associated with treatment of CKD by stage and treatment modality.....                                            | 21 |
| Supplemental Table S30: Health state utility inputs and event-related disutility .....                                                                            | 22 |
| Supplemental Table S31: Absenteeism and presenteeism in patients with CKD .....                                                                                   | 23 |
| Supplemental Table S32: Absenteeism in caregivers of patients with CKD .....                                                                                      | 24 |
| Supplemental Table S33: Productivity inputs .....                                                                                                                 | 24 |
| Supplemental Table S34: Annual per patient environmental burden associated with CKD .....                                                                         | 25 |
| Supplemental Table S35: Lifestyle and Financial burden associated with CKD .....                                                                                  | 25 |
| Validation and Calibration Targets.....                                                                                                                           | 26 |
| Supplemental Table S36: Targets for model calibration and external validation.....                                                                                | 26 |
| UK Case Study Results.....                                                                                                                                        | 29 |
| Supplemental Table S37: IMPACT CKD predictions for change from baseline (2022) to 2032 for clinical, economic, patient, societal, and environmental burdens ..... | 29 |
| Supplementary References.....                                                                                                                                     | 31 |

## Validation and Calibration for IMPACT CKD Model

Uncertainty in these models is a product of bias, simplification errors, and knowledge gaps that variably impacts the ability of model structures to replicate disease (i.e., the model health states are a simplification of a complex disease and may introduce unknown bias). As an example of simplification error in the present analysis, the IMPACT model used CKD stages such that costs and event risks progressed in a step wise manner. In reality, CKD progresses gradually and continuously with risk of events and costs varying within CKD states as well as between states. Further simplifications were made in limiting the number and types of patient characteristics and comorbidities considered, as the model is comprehensive but does not account for burdens such as obesity, smoking, etc. The data inputs used also introduced several potential sources of error such as; population sampling (i.e., study sample may not fully reflect country population), uncertainty due to reporting variability (i.e., data may not be uniformly reported or have differences in outcome definition), measurement error in the design and conduct of the study collecting the data, random error (i.e., studies may be underpowered to provide a robust estimate), and inconsistency introduced by data combination (i.e., data from multiple studies with varying populations, methodology, year of study were used). Due to this, using and combining input data without calibration was unlikely to produce model results that provide an accurate reflection of the population of interest.

For the IMPACT CKD model, four validation steps were used to assess and improve model validity. The model structure underwent tests of face validity with clinical experts in each country where an analysis was performed during the development phase. Verification or technical validation included review by an external programmer, coding walk throughs, and extreme value testing. Cross-validation was conducted versus the Inside CKD model built by Tangri and team, a patient-level microsimulation built in 2022 to project the epidemiological and economic impacts of CKD up to five years,<sup>8</sup> and the UK Kidney Research model, a population-level Markov model to investigate the kidney disease landscape in UK from 2023 to 2033.<sup>3</sup> Finally, calibration of select model inputs for the UK case study was conducted within a plausible range to align model outcomes with the validation targets (**Supplemental Table S36**). The calibration process involved an iterative process of adjusting inputs values (e.g., HR for CV events by CKD stage) within clinically plausible ranges to match validation targets (e.g. numbers of patients on dialysis). Prioritization of validation targets was reflected in the order of the parameters in **Supplemental Table S36**.

IMPACT CKD was aligned with the UK Kidney Research unconstrained projections for the number of patients on dialysis at year five and within the range of unconstrained and constrained projections for patients receiving a new transplant at year 10. In both models, 10-year growth was driven by assumptions regarding the rate of kidney transplantation. IMPACT CKD used current incident rates of transplantation and dialysis per million population with growth in incident transplantation consistent with growth in the general population (to model change in organ availability), and growth in incident dialysis consistent with changes in historical rates. In contrast, the UK Kidney Research model assumed constrained or unconstrained growth in transplantation and dialysis. The true number of transplants and new dialysis cases in future years will be contingent on supply of organs and access to dialysis, and as such is uncertain. However, the growth in dialysis patients projected by the IMPACT CKD model (18% over eight years) is supported by historical data on dialysis growth from the UK Renal Registry (15% over eight years). Inside CKD reported lower rates of growth of dialysis and transplantation.

## Model Inputs

Supplemental Table S1: CKD stage as defined by eGFR and UACR

| eGFR  | UACR (mg/g) |        |      |
|-------|-------------|--------|------|
|       | <30         | 30-300 | >300 |
| <15   | 5           | 5      | 5    |
| 15-29 | 4           | 4      | 4    |
| 30-44 | 3b          | 3b     | 3b   |
| 45-59 | 3a          | 3a     | 3a   |
| 60-89 | No CKD      | 2      | 2    |
| ≥90   | No CKD      | 1      | 1    |

**Abbreviations:** CKD = chronic kidney disease; eGFR = estimated glomerular filtration rate; KDIGO = Kidney Disease Improving Global Outcomes; NICE = National Institute for Health and Care Excellence; UACR = urinary albumin creatinine ratio.

**Source:** KDIGO and NICE guidelines<sup>17,18</sup>

**Supplemental Table S2: eGFR equations for CKD progressors**

| Variable                                           | Beta Coefficient         |                            |
|----------------------------------------------------|--------------------------|----------------------------|
|                                                    | <i>Fast progressors</i>  | <i>General progressors</i> |
| <b><i>Intercept</i></b>                            | <b><i>-5.5996756</i></b> | <b><i>1.755951074</i></b>  |
| Age at study index                                 | 0.014943805              | -0.02402287                |
| Sex: male (vs. female)                             | -0.11722897              | -0.09556822                |
| Heart failure diagnosis (yes vs. no)               | -0.48923154              | 0.113886703                |
| Hypertension diagnosis (yes vs. no)                | 0.129370109              | 0.039749304                |
| Myocardial infarction prior diagnosis (yes vs. no) | 0.091076059              | 0.020328179                |
| Stroke prior diagnosis (yes vs. no)                | 0.02648745               | 0.067249773                |
| Diabetes diagnosis (yes vs. no)                    | -0.56161103              | 0.340769213                |
| eGFR (per unit higher)                             | -0.02916478              | -0.00693121                |
| UACR (per unit higher)                             | -0.00059024              | -0.00025429                |

**Abbreviations:** CKD = Chronic kidney disease; eGFR = estimated glomerular filtration rate; UACR = urine albumin creatinine ratio.

**Source:** DISCOVER CKD<sup>11,24</sup>

**Supplemental Table S3: Key Model Assumptions**

| Category                           | Assumption                                                                                                                                                                                                                                                                                                                                                                                                                                                                                                                                                                             |
|------------------------------------|----------------------------------------------------------------------------------------------------------------------------------------------------------------------------------------------------------------------------------------------------------------------------------------------------------------------------------------------------------------------------------------------------------------------------------------------------------------------------------------------------------------------------------------------------------------------------------------|
| Population and disease projections | The 10-year projections assumed that policies and funding allow a growth rate in dialysis and transplant availability as per historical trends. Transplant growth (1% per year) was based on country population growth assumed to reflect the number of organs available. Dialysis growth was based on historical data for number of patients initiating dialysis (3% per year). Notably, these constraints will be tested in future policy analyses.                                                                                                                                  |
|                                    | Interdependence of patient characteristics was not considered due to a lack of comprehensive data that would inform a correlation matrix for all patient characteristics.                                                                                                                                                                                                                                                                                                                                                                                                              |
|                                    | eGFR and albuminuria values were not adjusted for comorbidities due to limitations in the available data.                                                                                                                                                                                                                                                                                                                                                                                                                                                                              |
|                                    | Hypothetical individuals entering the model due to births or immigration did not have CKD and would not develop CKD within the 10-year time horizon. This is a simplifying assumption reflecting the low rates in those populations.                                                                                                                                                                                                                                                                                                                                                   |
| Clinical events                    | Due to a lack of comprehensive data in patients with CKD, the model did not consider the impact of patient characteristics (except CKD stage), including comorbidities, on the incidence of a clinical event. Instead, rates for patients with CKD were estimated using rates of events were for the general population adjusted by a hazard ratio for each event by CKD stage.                                                                                                                                                                                                        |
|                                    | Patients could only have one of each type of event per cycle. This is a simplifying assumption.                                                                                                                                                                                                                                                                                                                                                                                                                                                                                        |
|                                    | Clinical events for patients living with a kidney transplant or on dialysis were not simulated.                                                                                                                                                                                                                                                                                                                                                                                                                                                                                        |
|                                    | Conservatively, the occurrence of a hospitalization due to a HF event was only assigned in patients with HF.                                                                                                                                                                                                                                                                                                                                                                                                                                                                           |
| Discounting                        | Costs and QALYs were not discounted or adjusted for inflation.                                                                                                                                                                                                                                                                                                                                                                                                                                                                                                                         |
| Transplantation                    | The model did not differentiate between types of transplants (i.e., living donor, deceased donor, grafts) instead using average data for costs and survival.                                                                                                                                                                                                                                                                                                                                                                                                                           |
|                                    | The probability of primary transplant graft failure and subsequent graft failure was not captured in the model (ie., transplants were assumed to last for the entire time horizon).                                                                                                                                                                                                                                                                                                                                                                                                    |
| Environmental impacts of CKD       | <p>The environmental inputs used in the analyses were associated to patients with CKD. However, the environmental impact may not be specific to CKD.</p> <p>For example, a patient with CKD stage 2 may also have another comorbidity, such as diabetes or hypertension, that may increase their water consumption, fossil fuel depletion, and carbon production. As such, for some patients CKD may contribute to a small proportion of the total impact. Because of this, care should be taken when projecting the incremental impact of reducing CKD occurrence or progression.</p> |

| Category   | Assumption                                                                                                                                                               |
|------------|--------------------------------------------------------------------------------------------------------------------------------------------------------------------------|
| Validation | The model assumed that validation targets are representative of the country population; however, the validation targets have uncertainty due to data collection methods. |

**Abbreviations:** CKD = chronic kidney disease; eGFR = estimated glomerular filtration rate; HF = heart failure; QALY = quality-adjusted life year; UK = United Kingdom.

**Supplemental Table S4: Validation targets and input parameters subject to calibration**

| Validation Target                                                                                    | Contributing Model Input                                                                                                                                                                                                               | Rationale                                                                                                                                                                                                                                                                                      |
|------------------------------------------------------------------------------------------------------|----------------------------------------------------------------------------------------------------------------------------------------------------------------------------------------------------------------------------------------|------------------------------------------------------------------------------------------------------------------------------------------------------------------------------------------------------------------------------------------------------------------------------------------------|
| Baseline CKD stage distribution                                                                      | eGFR value distribution and albuminuria value distribution by age and sex in the population                                                                                                                                            | The data for eGFR and albuminuria distribution were often derived from studies with small sample size, or potential sample bias due to convenience sampling (e.g., populations with CKD, elderly populations, patients undergoing medical care). CKD stage distribution is a key model driver. |
| Prevalence of dialysis patients and growth rate over time                                            | Eligibility criteria (probability of initiating dialysis by eGFR thresholds, willingness to initiate dialysis by age), rate of eGFR decline in fast and slow progressors, proportion of fast progressors, baseline dialysis population | Calibrated due to number of contributing inputs and to produce a baseline dialysis population and a growth rate that matched historical population data. This assumes that policies and funding will allow a growth rate in dialysis availability as per historical trends.                    |
| Prevalence of patients living with a kidney transplant and growth rate over time                     | Eligibility criteria (age threshold, eGFR threshold), probability of receiving transplant if eligible, rate of eGFR decline in fast and slow progressors, proportion of fast progressors, baseline transplant population               | Calibrated due to number of contributing inputs and to produce a baseline transplant population and a growth rate that matched historical population data. This assumes that policies and funding will allow a growth rate transplant availability as per historical trends.                   |
| Probability of death in the total population (with and without CKD)                                  | Mortality event rates due to stroke, MI, AKI, and kidney transplant<br><br>Annual rates of death for patients living with dialysis, kidney transplant, HF, or CKD not treated with RRT and general population mortality                | Calibrated due to number of contributing inputs and to avoid double counting as general population mortality and CKD stage mortality would include the influence of CV, AKI events, HF, dialysis, and transplant.                                                                              |
| Incidence of MI, stroke, and hospitalization due to HF per million population (with and without CKD) | Annual probability by age and sex for general population, HR for increased risk by CKD stage                                                                                                                                           | Calibrated to align with country-specific annual event estimates and due to number of contributing inputs and to avoid double counting as general population rate would include patients with CKD.                                                                                             |



| Validation Target                                                                                       | Contributing Model Input                                                                     | Rationale                                                                                                                                                                                                                                                                    |
|---------------------------------------------------------------------------------------------------------|----------------------------------------------------------------------------------------------|------------------------------------------------------------------------------------------------------------------------------------------------------------------------------------------------------------------------------------------------------------------------------|
| Incidence of AKI events per million population (with and without CKD)                                   | Annual probability by age and sex for general population, HR for increased risk by CKD stage | Calibrated to produce an AKI event incidence that was reasonable and aligned with country specific estimates. AKI data in general were expected to have high uncertainty due to variability in documenting AKI events in clinics and a limited number of studies to utilize. |
| Incidence of HF cases per million population (with and without CKD)                                     | Annual probability by age and sex for general population, HR for increased risk by CKD stage | Calibrated to align with country-specific annual event estimates and due to number of contributing inputs and to avoid double counting as general population rate would include patients with CKD.                                                                           |
| Baseline prevalence of hypertension, stroke, MI, HF, diabetes among all patients (with and without CKD) | Prevalence rate by age and sex, prevalence rate by CKD stage                                 | Calibrated to avoid double counting as general population rate would include patients with CKD.                                                                                                                                                                              |
| CKD Growth                                                                                              | Non-CKD annual eGFR decline rate                                                             | Calibrated within a range from the literature to ensure growth of CKD at an acceptable rate.                                                                                                                                                                                 |
| Dialysis and transplant survival at years 1, 5, and 10                                                  | Dialysis and transplant mortality rates in year 1 and subsequent years                       | Calibrated as mortality rates for each country are not readily available; however, long-term survival data is often captured. This model input was calibrated to match the survival data of each country.                                                                    |

**Abbreviations:** AKI = acute kidney injury; CKD = chronic kidney disease; CV = cardiovascular; eGFR = estimated glomerular filtration rate; HF = heart failure; HR = hazard ratio; MI = myocardial infarction; RRT = renal replacement therapy.

**Supplemental Table S5: Kidney transplantation model inputs**

| Parameter                                                                         | Value | Source                                |
|-----------------------------------------------------------------------------------|-------|---------------------------------------|
| Age eligibility threshold (years) <sup>a</sup>                                    | 75    | Expert opinion                        |
| eGFR eligibility threshold (mL/min/1.73 m <sup>2</sup> )                          | 10    | Expert opinion                        |
| Percentage of eligible patients receiving transplant                              |       |                                       |
| Percentage of incident RRT patients who receive a transplant                      | 5.9%  | UK Renal Registry, 2022 <sup>15</sup> |
| Proportion of patients transitioning to transplant after dialysis <sup>b, c</sup> |       |                                       |
| HD – year 1                                                                       | 5.6%  | UK Renal Registry, 2022 <sup>15</sup> |
| HD – subsequent years                                                             | 3.18% |                                       |
| PD – year 1                                                                       | 14.7% |                                       |
| PD – subsequent years                                                             | 6.10% |                                       |

<sup>a</sup>No transplant at or above age threshold. All patients above threshold receive palliative care.

<sup>b</sup>Subsequent year transition rate was calculated using Year 1 and year 5 rates.

<sup>c</sup>Proportion of patients transitioning to transplant for patients on HD was used for both home- and clinic-based HD.

**Abbreviations:** eGFR = estimated glomerular filtration rate; HD = hemodialysis; PD = peritoneal dialysis; RRT = renal replacement therapy; UK = United Kingdom.

**Supplemental Table S6: Dialysis model inputs – Percentage of eligible patients by eGFR**

| Parameter                       | Value | Source                                                                |
|---------------------------------|-------|-----------------------------------------------------------------------|
| Probability of dialysis         |       |                                                                       |
| 15-19 mL/min/1.73m <sup>2</sup> | 0%    | Expert opinion                                                        |
| 10-14 mL/min/1.73m <sup>2</sup> | 75%   |                                                                       |
| 5-9 mL/min/1.73m <sup>2</sup>   | 100%  | KDIGO 2019 <sup>S1, a</sup> ; UK Renal Registry 2022 <sup>15, b</sup> |
| <5 mL/min/1.73m <sup>2</sup>    | 100%  | As per above                                                          |
| Probability of modality         |       |                                                                       |
| In-center HD                    | 77%   | UK Renal Registry, 2022 <sup>15, c</sup>                              |
| PD                              | 23%   |                                                                       |

<sup>a</sup>A specified eGFR value for initiation dialysis has not been established (usually based on symptoms); often between 5-10.

<sup>b</sup>Geometric mean eGFR at initiation is 7.10 (6.99-7.22) for HD; 7.43 (7.21-7.64) for PD; 10 (9.56-10.5) for transplant.

<sup>c</sup>Calculated from incident dialysis patients

**Abbreviations:** eGFR = estimated glomerular filtration rate; HD = hemodialysis; KDIGO = Kidney Disease: Improving Global Outcomes; PD = peritoneal dialysis; UK = United Kingdom.

**Supplemental Table S7: Dialysis model inputs – Percentage of eligible patients that receive conventional kidney supportive care by age and eGFR**

| Age (Years) | eGFR (mL/min/1.73 m <sup>2</sup> ) |      |       |       |
|-------------|------------------------------------|------|-------|-------|
|             | <5                                 | 5-9  | 10-14 | 15-19 |
| <70         | 5.0                                | 5.0  | 5.0   | 5.0   |
| 70-74       | 20.0                               | 20.0 | 20.0  | 20.0  |
| 75-79       | 40.0                               | 40.0 | 40.0  | 40.0  |
| 80-84       | 50.0                               | 50.0 | 50.0  | 50.0  |
| 85+         | 70.0                               | 70.0 | 70.0  | 70.0  |

**Abbreviations:** eGFR = estimated glomerular filtration rate.

**Source:** Clinical expert opinion.

**Supplemental Table S8: Event risk – Annual probabilities of MI for the general UK population by age and sex**

| Age group   | Male (per 100,000) | Female (per 100,000) |
|-------------|--------------------|----------------------|
| 0-44 years  | -                  | -                    |
| 45-54 years | 167.0              | 52.9                 |
| 55-64 years | 321.3              | 95.8                 |
| 65-74 years | 359.5              | 155.0                |
| 75+ years   | 587.4              | 340.7                |

**Abbreviations:** MI = myocardial infarction; UK = United Kingdom.

**Source:** British Heart Foundation, 2020<sup>20</sup>

**Supplemental Table S9: Event risk – Annual probabilities of stroke/TIA for the general UK population by age and sex**

| Age group   | Male (per 100,000) | Female (per 100,000) |
|-------------|--------------------|----------------------|
| 0-44 years  | -                  | -                    |
| 45-54 years | 157.8              | 119.5                |
| 55-64 years | 325.9              | 235.4                |
| 65-74 years | 665.3              | 466.1                |
| 75+ years   | 1 385.3            | 1 275.8              |

**Abbreviations:** TIA = transient ischemic attack; UK = United Kingdom.

**Source:** British Heart Foundation, 2020<sup>20</sup>

**Supplemental Table S10: Event risk – Annual probabilities of AKI for the general UK population by age**

| Age (years) | Incidence rates (per 10,000 PY) Grampian, UK |
|-------------|----------------------------------------------|
| 18-29       | 28.5                                         |
| 30-39       | 40.8                                         |
| 40-49       | 41.6                                         |
| 50-59       | 80.8                                         |
| 60-69       | 179                                          |
| 70-79       | 369                                          |
| ≥80         | 773                                          |

**Abbreviations:** AKI = acute kidney injury; PY = patient-year; UK = United Kingdom.

**Source:** Sawhney et al., 2022<sup>S2</sup>

**Supplemental Table S11: Event risk – Annual probabilities of HF resulting in hospitalization for the general UK population by age**

| Characteristic | Rate per 100 PY |
|----------------|-----------------|
| Age <70        | 14.1            |
| Age 70-79      | 18.1            |
| Age 80-89      | 26.9            |
| Age ≥90        | 35.2            |

**Abbreviations:** HF = heart failure; PY = patient-year; UK = United Kingdom.

**Source:** Lawson et al., 2019<sup>S3</sup>

**Supplemental Table S12: Event risk – CKD-specific relative risk of MI by CKD stage and age**

| CKD Stage        | Relative Risk | 95% CI      |
|------------------|---------------|-------------|
| Aged 20-64 years |               |             |
| 1                | 1.19          | 0.64 – 2.22 |
| 2                | 1.19          | 0.64 – 2.22 |
| 3                | 2.06          | 1.48 – 2.87 |
| 4                | 2.06          | 1.48 – 2.87 |
| 5                | 2.06          | 1.48 – 2.87 |
| Aged 65+ years   |               |             |
| 1                | 1.01          | 0.83 – 1.23 |
| 2                | 1.01          | 0.83 – 1.23 |
| 3                | 1.38          | 1.26 – 1.51 |
| 4                | 1.38          | 1.26 – 1.51 |
| 5                | 1.38          | 1.26 – 1.51 |

**Abbreviations:** CI = confidence interval; CKD = chronic kidney disease; MI = myocardial infarction; US = United States.

**Source:** U.S. Renal Data System.<sup>S4</sup>

**Supplemental Table S13: Event risk – CKD-specific hazard ratios for incidence of stroke by eGFR and UACR status**

| eGFR (ml/min/1.73m <sup>2</sup> ) | Normal albuminuria (< 30 mg/g) | Microalbuminuria (30-300 mg/g) | Macroalbuminuria (> 300mg/g) |
|-----------------------------------|--------------------------------|--------------------------------|------------------------------|
| >90                               | Reference                      | 1.53                           | 1.94                         |
| 60-90                             | 1.14                           | 1.75                           | 2.22                         |
| 30-60                             | 1.64                           | 2.50                           | 3.17                         |
| 15-30                             | 2.78                           | 4.26                           | 5.40                         |
| <15                               | 2.78                           | 4.26                           | 5.40                         |

**Abbreviations:** CKD = chronic kidney disease; eGFR = estimated glomerular filtration rate; g = grams; mg = milligrams; UACR = urinary albumin-creatinine ratio.

**Source:** Masson et al., 2015<sup>S5</sup>

**Supplemental Table S14: Event risk – CKD-specific relative risk of AKI by CKD stage and age**

| CKD Stage (eGFR, ml/min/1.73m <sup>2</sup> ) | Relative Risk   |
|----------------------------------------------|-----------------|
| 1 (>90)                                      | -               |
| 2 (60-89)                                    | eGFR 60 = 0.993 |
| 3a (45-59)                                   | eGFR 45 = 1.14  |
| 3b (30-44)                                   | eGFR 30 = 1.67  |
| 4 (15-29)                                    | eGFR 15 = 5.49  |
| 5 (<15)                                      | eGFR 15 = 5.49  |

**Abbreviations:** AKI = acute kidney injury; CKD = chronic kidney disease; eGFR = estimated glomerular filtration rate.

**Source:** Grams et al., 2015<sup>S6</sup>

**Supplemental Table S15: Event risk – CKD-specific rate ratios of hospitalization due to HF by CKD category**

| CKD category        | Rate Ratio      |
|---------------------|-----------------|
| eGFR >45, UACR <300 | 1.0 (reference) |
| eGFR <45, UACR <300 | 2.3             |
| eGFR >45, UACR >300 | 2.9             |
| eGFR <45, UACR >300 | 3.0             |

**Note:** Model adjustments include age, sex, and race/ethnicity, diabetes, history of cardiovascular disease, use of lipid-lowering medications, smoking, systolic blood pressure, and body mass index, use of diuretics, ACE inhibitors/ARBs and  $\beta$ -blocker.

**Abbreviations:** ACE Angiotensin-converting enzyme; ARB = Angiotensin receptor blockers; eGFR = estimated glomerular filtration rate; HF = heart failure; UACR = urinary albumin creatinine ratio.

**Source:** Bansal et al., 2019<sup>S7</sup>

**Supplemental Table S16: Event risk – Outcomes of AKI**

| Outcome                                                                                         | Proportion of patients | One-time eGFR decline reduction |
|-------------------------------------------------------------------------------------------------|------------------------|---------------------------------|
| Full recovery (defined as return to baseline serum creatinine)                                  | 43%                    | 0                               |
| Partial recovery (defined as return to serum creatinine is within 1.5 times the baseline value) | 30%                    | 12.5% <sup>a</sup>              |
| No recovery (defined as return to serum creatinine is above 1.5 times the baseline value)       | 27%                    | 25% <sup>b</sup>                |

<sup>a</sup> As a conservative assumption using the RIFLE severity classification (i.e., increased creatinine of 1.5-fold is similar to a >25% eGFR decline), patients in partial recovery were assumed to have a one-time eGFR reduction of 12.5%.

<sup>b</sup> As a conservative assumption using the RIFLE severity classification (i.e., increased creatinine of 1.5-fold is similar to a >25% eGFR decline), patients who did not recover were assumed to have a one-time eGFR reduction of 25%.

**Abbreviations:** AKI = acute kidney injury; eGFR = estimated glomerular filtration rate; RIFLE = Risk, Injury, and Failure; and Loss; and End-stage kidney disease.

**Source:** Duarte et al., 2022<sup>S8</sup>

**Supplemental Table S17: Relative risk of all-cause mortality by CKD Stage**

| eGFR (mL/min/1.73m <sup>2</sup> ) | Albumin excretion rate                     |                                     |                                   |
|-----------------------------------|--------------------------------------------|-------------------------------------|-----------------------------------|
|                                   | A1: Normal to mild albuminuria (<30mg/24h) | A2: Microalbuminuria (30-300mg/24h) | A3: Macroalbuminuria (>300mg/24h) |
| ≥90                               | Reference group                            | 1.5                                 | 3.1                               |
| 60-90                             | 1.0                                        | 1.7                                 | 2.3                               |
| 45-60                             | 1.3                                        | 2.2                                 | 3.6                               |
| 30-44                             | 1.9                                        | 3.3                                 | 4.9                               |
| 15-30                             | 5.3                                        | 4.7                                 | 6.6                               |
| <15                               | 5.3                                        | 4.7                                 | 6.6                               |

**Assumptions:** RR for albumin excretion rate <10 in that figure are included as risks for A1 as these are the most conservative; eGFR 90-105 in that figure is taken as the reference group for G1 (eGFR>90); eGFR 15-30 in that figure is taken as the relative risk for G5 (eGFR<15).

**Abbreviations:** CKD = chronic kidney disease; eGFR = estimated glomerular filtration rate; h = hours; mg = milligrams.

**Source:** Adapted from Levey et al, 2011.<sup>S9</sup>

**Supplemental Table S18: Mortality – Probability of patient survival by transplant type**

| Events         | Number of kidney transplants (2020) | 1-year Survival | 5-year Survival | 10-year Survival |
|----------------|-------------------------------------|-----------------|-----------------|------------------|
| Deceased Donor | 1 903                               | 96%             | 88%             | 73%              |
| Living Donor   | 586                                 | 99%             | 95%             | 86%              |

**Source:** UK Renal Registry, 2022<sup>15</sup>

**Supplemental Table S19: Dialysis mortality – Probability of patient mortality by age**

| Age   | 1-year mortality | Subsequent years |
|-------|------------------|------------------|
| 0-34  | 1.84%            | 4.18%            |
| 35-44 | 4.14%            |                  |
| 45-54 | 6.90%            | 6.33%            |
| 55-64 | 11.04%           | 8.51%            |
| 65-74 | 16.10%           | 9.89%            |
| 75-84 | 23.00%           | 11.27%           |
| 85+   | 29.90%           |                  |

**Source:** Moist et al., 2014;<sup>S10</sup> Robinson et al., 2013<sup>S11</sup>

**Supplemental Table S20: Mortality – Probability of patient mortality from clinical events**

| Events | Rates (Men) | Rates (Women) | Source                                       |
|--------|-------------|---------------|----------------------------------------------|
| MI     | 25.4%       | 24%           | Asaria et al., 2022 <sup>S12, a</sup>        |
| Stroke | 15%         | 15%           | British Heart Foundation, 2021 <sup>20</sup> |
| AKI    | 17.02%      | 17.02%        | Think Kidneys 2018 <sup>S13, b</sup>         |
| HF     | 22.1%       | 24.6%         | Taylor 2020 <sup>S14, c</sup>                |

<sup>a</sup> Based on a large, retrospective study using linked data from national databases on hospitalizations and deaths with MI from 2015 to 2018.

<sup>b</sup> Calculated as an age- and sex- standardized 30-day mortality rate from AKI episodes from the last 12 months reported to the UK Renal Registry (2016-2017).

<sup>c</sup> Calculated as a one-year mortality rate. Based on a large, retrospective study using UK primary care data for 26,725 women and 29,234 men over age 45 with a new diagnosis of HF between 2001 and 2017 using the Clinical Practice Research Datalink, inpatient Hospital Episode Statistics and the Office for National Statistics death registry.

**Abbreviations:** AKI = acute kidney injury; HF = heart failure; MI = myocardial infarction; UK = United Kingdom.

**Supplemental Table S21: Mortality rates (qx), males and females, UK, 2018-2020**

| <b>Age (years)</b> | <b>Male</b> | <b>Female</b> |
|--------------------|-------------|---------------|
| 0                  | 0.004224    | 0.003503      |
| 1                  | 0.000229    | 0.000214      |
| 2                  | 0.000127    | 0.000114      |
| 3                  | 0.000102    | 0.000095      |
| 4                  | 0.000086    | 0.000064      |
| 5                  | 0.000074    | 0.000074      |
| 6                  | 0.000085    | 0.000071      |
| 7                  | 0.000067    | 0.000055      |
| 8                  | 0.000069    | 0.000058      |
| 9                  | 0.00006     | 0.000051      |
| 10                 | 0.000078    | 0.000066      |
| 11                 | 0.000077    | 0.000055      |
| 12                 | 0.000102    | 0.000057      |
| 13                 | 0.000116    | 0.000087      |
| 14                 | 0.000129    | 0.000096      |
| 15                 | 0.000172    | 0.000113      |
| 16                 | 0.000205    | 0.000131      |
| 17                 | 0.000311    | 0.000158      |
| 18                 | 0.000402    | 0.000218      |
| 19                 | 0.000454    | 0.000212      |
| 20                 | 0.000525    | 0.000187      |
| 21                 | 0.000507    | 0.000211      |
| 22                 | 0.000497    | 0.000245      |
| 23                 | 0.000524    | 0.000215      |
| 24                 | 0.000556    | 0.000223      |
| 25                 | 0.000601    | 0.00026       |
| 26                 | 0.000607    | 0.000257      |
| 27                 | 0.000629    | 0.00031       |
| 28                 | 0.000681    | 0.000314      |
| 29                 | 0.000728    | 0.000338      |
| 30                 | 0.000771    | 0.000387      |
| 31                 | 0.000835    | 0.000394      |
| 32                 | 0.000858    | 0.000468      |
| 33                 | 0.000957    | 0.000493      |
| 34                 | 0.000989    | 0.000585      |
| 35                 | 0.0011      | 0.000592      |
| 36                 | 0.001155    | 0.000678      |
| 37                 | 0.001351    | 0.000761      |
| 38                 | 0.001317    | 0.000792      |
| 39                 | 0.001457    | 0.000868      |
| 40                 | 0.001606    | 0.000924      |
| 41                 | 0.0017      | 0.001004      |
| 42                 | 0.001848    | 0.001102      |



| Age (years) | Male     | Female   |
|-------------|----------|----------|
| 43          | 0.002015 | 0.001239 |
| 44          | 0.00221  | 0.001345 |
| 45          | 0.002467 | 0.001484 |
| 46          | 0.002646 | 0.001625 |
| 47          | 0.002743 | 0.001744 |
| 48          | 0.00296  | 0.001966 |
| 49          | 0.003297 | 0.002051 |
| 50          | 0.003577 | 0.002234 |
| 51          | 0.003821 | 0.002452 |
| 52          | 0.004075 | 0.002581 |
| 53          | 0.004402 | 0.002764 |
| 54          | 0.00472  | 0.002964 |
| 55          | 0.005046 | 0.003283 |
| 56          | 0.005593 | 0.003637 |
| 57          | 0.00606  | 0.003928 |
| 58          | 0.006695 | 0.004367 |
| 59          | 0.007239 | 0.004707 |
| 60          | 0.007912 | 0.005247 |
| 61          | 0.008636 | 0.005636 |
| 62          | 0.009601 | 0.006451 |
| 63          | 0.010552 | 0.006818 |
| 64          | 0.011171 | 0.007379 |
| 65          | 0.01246  | 0.008113 |
| 66          | 0.013853 | 0.00877  |
| 67          | 0.014782 | 0.009554 |
| 68          | 0.016348 | 0.010602 |
| 69          | 0.017949 | 0.011458 |
| 70          | 0.019238 | 0.012895 |
| 71          | 0.020795 | 0.013637 |
| 72          | 0.022782 | 0.015499 |
| 73          | 0.025799 | 0.017289 |
| 74          | 0.028776 | 0.019688 |
| 75          | 0.0323   | 0.021766 |
| 76          | 0.03573  | 0.024397 |
| 77          | 0.040136 | 0.027918 |
| 78          | 0.045188 | 0.03142  |
| 79          | 0.050259 | 0.035713 |
| 80          | 0.056143 | 0.039611 |
| 81          | 0.06203  | 0.045127 |
| 82          | 0.069197 | 0.050197 |
| 83          | 0.077486 | 0.057155 |
| 84          | 0.087296 | 0.065142 |
| 85          | 0.097476 | 0.073748 |
| 86          | 0.110221 | 0.08452  |

| Age (years) | Male     | Female   |
|-------------|----------|----------|
| 87          | 0.122808 | 0.095918 |
| 88          | 0.137654 | 0.107798 |
| 89          | 0.154513 | 0.121609 |
| 90          | 0.163489 | 0.136466 |
| 91          | 0.183325 | 0.153438 |
| 92          | 0.200869 | 0.171026 |
| 93          | 0.222981 | 0.189568 |
| 94          | 0.244606 | 0.20787  |
| 95          | 0.268951 | 0.230227 |
| 96          | 0.290494 | 0.253171 |
| 97          | 0.31405  | 0.277939 |
| 98          | 0.335507 | 0.299649 |
| 99          | 0.369942 | 0.31991  |
| 100         | 0.390506 | 0.350742 |

**Abbreviations:** UK = United Kingdom.

**Source:** UK Office for National Statistics<sup>14</sup>

**Supplemental Table S22: Comorbidities risk – Annual probabilities of T2DM for the general UK population by age**

| Age (years) | Males (per 100,000) | Females (per 100,000) |
|-------------|---------------------|-----------------------|
| 16-24       | 2.1                 | 1.0                   |
| 25-34       | 8.3                 | 6.22                  |
| 35-44       | 23.7                | 14.5                  |
| 45-54       | 51.5                | 33.3                  |
| 55-64       | 80.4                | 54.1                  |
| 65-74       | 88.7                | 61.4                  |
| 75+         | 99.0                | 67.7                  |

**Abbreviations:** T2DM = type 2 diabetes mellitus; UK = United Kingdom.

**Source:** Zghebi et al., 2017<sup>S15</sup>

**Supplemental Table S23: Comorbidities risk – Annual probabilities of HTN for the general UK population by age and sex**

| Age   | Male (2-year incidence, per 100) | Female (2-year incidence, per 100) |
|-------|----------------------------------|------------------------------------|
| 30-39 | 3.32                             | 1.44                               |
| 40-49 | 4.46                             | 3.59                               |
| 50-59 | 4.72                             | 5.01                               |
| 60-69 | 5.66                             | 6.92                               |
| 70-79 | 6.25                             | 8.61                               |

**Abbreviations:** HF = heart failure; HTN = hypertension; UK = United Kingdom.

**Source:** Framingham Study, Dannenberg 1988.<sup>S16</sup>

**Supplemental Table S24: Comorbidities risk – Annual probabilities of HF for the general UK population by age and sex**

| Age (years) | Male (per 100,000) | Female (per 100,000) |
|-------------|--------------------|----------------------|
| 45-54       | 64.5               | 32.3                 |
| 55-64       | 161.6              | 71.9                 |
| 65-75       | 353.9              | 197.3                |
| 75+         | 1 182.2            | 801.6                |

**Abbreviations:** HF = heart failure; UK = United Kingdom.

**Source:** British Heart Foundation, 2020<sup>20</sup>

**Supplemental Table S25: Comorbidities risk – CKD-specific relative risk of T2DM by CKD stage and age**

| CKD Stage (eGFR, mL/min/1.73m <sup>2</sup> ) | Relative Risk |
|----------------------------------------------|---------------|
| 1 (>90)                                      | 1.24          |
| 2 (60-89)                                    | 1.24          |
| 3a (45-59)                                   | 1.24          |
| 3b (30-44)                                   | 1.24          |
| 4 (15-29)                                    | 1.24          |
| 5 (<15)                                      | 1.24          |

**Abbreviations:** CKD = chronic kidney disease; eGFR = estimated glomerular filtration rate; HR = hazard ratio; T2DM = type 2 diabetes mellitus; UK = United Kingdom.

**Note:** HR of developing diabetes in overall CKD is 1.24

**Source:** Lin 2019<sup>S17</sup>

**Supplemental Table S26: Comorbidities risk – CKD-specific relative risk of HF by CKD stage and age**

| CKD Stage        | Relative Risk | 95% CI      |
|------------------|---------------|-------------|
| Aged 20-64 years |               |             |
| 1                | 1.49          | 1.14 -1.95  |
| 2                | 1.49          | 1.14 -1.95  |
| 3                | 2.96          | 2.56 – 3.41 |
| 4                | 2.96          | 2.56 – 3.41 |
| 5                | 2.96          | 2.56 – 3.41 |
| Aged 65+ years   |               |             |
| 1                | 1.45          | 1.33 – 1.68 |
| 2                | 1.45          | 1.33 – 1.68 |
| 3                | 1.68          | 1.61 – 1.75 |
| 4                | 1.68          | 1.61 – 1.75 |
| 5                | 1.68          | 1.61 – 1.75 |

**Abbreviations:** CI = confidence interval; CKD = chronic kidney disease; HF = heart failure.

**Source:** U.S. Renal Data System 2009<sup>S4</sup>

**Supplemental Table S27: Comorbidities risk – CKD-specific relative risk of HTN by CKD stage and age**

| CKD Stage (eGFR, mL/min/1.73m <sup>2</sup> ) | Relative Risk |
|----------------------------------------------|---------------|
| 1 (>90)                                      | 1.33          |
| 2 (60-89)                                    | 1.33          |
| 3a (45-59)                                   | 1.33          |
| 3b (30-44)                                   | 1.33          |
| 4 (15-29)                                    | 1.33          |
| 5 (<15)                                      | 1.33          |

**Abbreviations:** CKD = chronic kidney disease; eGFR = estimated glomerular filtration rate; HTN = hypertension.

**Source:** Hounkpatin et al., 2020<sup>S18</sup>

**Supplemental Table S28: Annual resource burden associated with CKD**

| CKD Stage/Treatment modality | ER visits per year | Hospitalizations per year | Outpatient visits per year |
|------------------------------|--------------------|---------------------------|----------------------------|
| Stage 1                      | 0                  | 0                         | 0                          |
| Stage 2                      | 0.304246           | 0.495608                  | 2.678467                   |
| Stage 3a                     | 0.332568           | 0.544815                  | 2.770741                   |
| Stage 3b                     | 0.450719           | 0.688983                  | 3.076986                   |
| Stage 4                      | 0.553543           | 0.947778                  | 4.039855                   |
| Stage 5                      | 0.834935           | 2.449808                  | 9.987087                   |
| Stage 5, Transplant          | 0.834935           | 2.449808                  | 9.987087                   |
| Stage 5, Dialysis            | 0.834935           | 2.449808                  | 9.987087                   |

**Abbreviations:** CKD = chronic kidney disease; ER = emergency room.

**Source:** DISCOVER CKD<sup>11</sup>

**Supplemental Table S29: Annual per patient costs associated with treatment of CKD by stage and treatment modality**

| Condition                         | Annual cost (£, 2022) | Source                                                                    |
|-----------------------------------|-----------------------|---------------------------------------------------------------------------|
| <b>CKD-related costs by stage</b> |                       |                                                                           |
| CKD Stage 1                       | Assumed 0             | -                                                                         |
| CKD Stage 2                       | Assumed 0             | -                                                                         |
| CKD Stage 3a                      | 851                   | AstraZeneca 2021 (DAPA-CKD); <sup>S19</sup><br>McEwan 2022 <sup>S20</sup> |
| CKD Stage 3b                      | 959                   |                                                                           |
| CKD Stage 4                       | 1 252                 |                                                                           |
| CKD Stage 5 (pre-RRT)             | 2 071                 |                                                                           |
| CKD Stage 5 (conservative care)   | 5 620                 | Kerr 2016 <sup>S21</sup>                                                  |
| <b>RRT-related costs</b>          |                       |                                                                           |
| Hemodialysis                      | 24 689                | NHS England and NHS Improvement, 2020 <sup>S22</sup>                      |
| Peritoneal Dialysis               | 29 061                |                                                                           |
| Transplant                        | 28 775                | NHS Improvement, 2019 <sup>S23</sup>                                      |
| Transplant Maintenance            | 6 369                 | NHS Blood and Transplant, 2017 <sup>S24</sup>                             |
| <b>Event-related costs</b>        |                       |                                                                           |
| MI                                | 6 027                 | Danese et al., 2016 <sup>S25</sup>                                        |
| Stroke                            | 2 802                 | Luengo-Fernandez et al., 2020 <sup>S26</sup>                              |
| AKI                               | 5 286                 | Kolhe et al., 2014 <sup>S27</sup>                                         |
| Hospitalization for HF            | 6 091                 | Osenenko et al., 2022 <sup>S28</sup>                                      |

**Abbreviations:** AKI = acute kidney injury; CKD = chronic kidney disease; DAPA-CKD = Dapagliflozin and Prevention of Adverse Outcomes in Chronic Kidney Disease; MI = myocardial infarction; NHS = National Health Service; RRT = renal replacement therapy.

**Supplemental Table S30: Health state utility inputs and event-related disutility**

| Condition                               | Utility  | Source                                                                    |
|-----------------------------------------|----------|---------------------------------------------------------------------------|
| <b>CKD-related health state utility</b> |          |                                                                           |
| CKD Stage 1                             | 0.850    | Assumed same as CKD Stage 2<br><br>Cooper et al., 2020 <sup>S29</sup>     |
| CKD Stage 2                             | 0.850    |                                                                           |
| CKD Stage 3a                            | 0.730    |                                                                           |
| CKD Stage 3b                            | 0.730    |                                                                           |
| CKD Stage 4                             | 0.740    |                                                                           |
| CKD Stage 5 (pre-RRT)                   | 0.740    |                                                                           |
| Peritoneal Dialysis                     | 0.570    |                                                                           |
| Hemodialysis                            | 0.670    |                                                                           |
| Post-transplant                         | 0.830    |                                                                           |
| <b>Event-related disutilities</b>       |          |                                                                           |
| MI (non-fatal)                          | -0.087   | AstraZeneca 2021 (DAPA-CKD); <sup>S19</sup><br>McEwan 2022 <sup>S20</sup> |
| Stroke                                  | -0.0524  | Sullivan et al., 2006 <sup>S30</sup>                                      |
| AKI                                     | -0.07825 | Perera et al., 2021 <sup>S31</sup>                                        |
| Hospitalization for HF                  | -0.076   | Luca DiTanna 2021 <sup>S32</sup>                                          |

**Abbreviations:** AKI = acute kidney injury; CKD = chronic kidney disease; DAPA-CKD = Dapagliflozin and Prevention of Adverse Outcomes in Chronic Kidney Disease; MI = myocardial infarction; NHS = National Health Service; RRT = renal replacement therapy

**Supplemental Table S31: Absenteeism and presenteeism in patients with CKD**

| CKD stage, treatment modality | Absenteeism (Days per year) |       | Presenteeism (Days per year) |       |
|-------------------------------|-----------------------------|-------|------------------------------|-------|
|                               | Mean                        | SD    | Mean                         | SD    |
| No CKD                        | -                           | -     | -                            | -     |
| Stage 1                       | -                           | -     | -                            | -     |
| Stage 2                       | -                           | -     | -                            | -     |
| Stage 3a                      | 17.04                       | 47.76 | 45.12                        | 47.52 |
| Stage 3b                      | 12.24                       | 35.52 | 47.04                        | 45.36 |
| Stage 4                       | 19.92                       | 47.76 | 66.96                        | 53.52 |
| Stage 5                       | 30.24                       | 55.2  | 51.12                        | 57.36 |
| Stage 5, Transplant           | 11.04                       | 47.04 | 36.0                         | 49.92 |
| Stage 5, Hemodialysis         | 29.28                       | 57.6  | 83.28                        | 59.28 |
| Stage 5, Peritoneal Dialysis  | 29.28                       | 57.6  | 83.28                        | 59.28 |

**Abbreviations:** CKD = chronic kidney disease; SD = standard deviation

**Source:** van Haalen et al., 2020<sup>S33</sup>

**Supplemental Table S32: Absenteeism in caregivers of patients with CKD**

| CKD stage, treatment modality | Absenteeism (Days per year) |           |
|-------------------------------|-----------------------------|-----------|
|                               | <i>Mean</i>                 | <i>SD</i> |
| Stage 1                       | 3.1                         | 18.2      |
| Stage 2                       | 3.1                         | 18.2      |
| Stage 3a                      | 3.1                         | 18.2      |
| Stage 3b                      | 3.1                         | 18.2      |
| Stage 4                       | 27.0                        | 84.6      |
| Stage 5                       | 27.0                        | 84.6      |
| Stage 5, Transplant           | 11                          | 31        |
| Stage 5, Hemodialysis         | 104.8                       | 325.1     |
| Stage 5, Peritoneal Dialysis  | 104.8                       | 325.1     |

**Abbreviations:** CKD = chronic kidney disease; SD = standard deviation

**Source:** Eriksson, 2017<sup>S34</sup>

**Supplemental Table S33: Productivity inputs**

| Input                                                      | Value | Source                                             |
|------------------------------------------------------------|-------|----------------------------------------------------|
| Cost per workday                                           | £134  | Office for National Statistics 2022 <sup>S35</sup> |
| UK purchase power parity                                   | 103   | OECD 2022 <sup>S36</sup>                           |
| Percent of absenteeism considered as sick-pay disbursement | 50%   | Assumption                                         |
| Percent of absenteeism considered as lost tax revenue      | 50%   | Assumption                                         |
| Average tax rate for UK worker                             | 35%   | OECD 2023 <sup>S37</sup>                           |

**Abbreviations:** OECD = Organization for Economic Co-operation and Development; SD = standard deviation; UK = United Kingdom.

**Supplemental Table S34: Annual per patient environmental burden associated with CKD**

| CKD stage, treatment modality   | Climate change (kg CO <sub>2</sub> eq.) | Fossil depletion (kg oil eq.) | Freshwater Consumption (m <sup>3</sup> ) |
|---------------------------------|-----------------------------------------|-------------------------------|------------------------------------------|
| Stage 1                         | 445                                     | 193                           | 2                                        |
| Stage 2                         | 482                                     | 212                           | 2                                        |
| Stage 3                         | 610                                     | 272                           | 3                                        |
| Stage 4                         | 841                                     | 377                           | 4                                        |
| Stage 5, conservative care      | 1 270                                   | 575                           | 6                                        |
| Stage 5, dialysis               | 4 950                                   | 2 200                         | 46                                       |
| Stage 5, transplant             | 2 620                                   | 1 110                         | 19                                       |
| Stage 5, transplant maintenance | 918                                     | 410                           | 4                                        |

**Abbreviations:** CKD = chronic kidney disease; CO<sub>2</sub> = carbon dioxide; eq. = equivalents; kg = kilograms.

**Source:** AstraZeneca Data on File<sup>S38</sup>; Zoccali et al. 2023<sup>12</sup>

**Supplemental Table S35: Lifestyle and Financial burden associated with CKD**

| CKD Stage              | % of Work Time Missed | % of Impairment in Daily Activities | CFPB Score | FACIT-Cost Score |
|------------------------|-----------------------|-------------------------------------|------------|------------------|
| Stage 1                | 31.4%                 | 47.1%                               | 51.89      | 26.54            |
| Stage 2                | 31.4%                 | 47.1%                               | 51.89      | 26.54            |
| Stage 3a               | 31.4%                 | 47.1%                               | 51.89      | 26.54            |
| Stage 3b               | 31.4%                 | 47.1%                               | 51.89      | 26.54            |
| Stage 4                | 31.4%                 | 47.1%                               | 51.89      | 26.54            |
| Stage 5                | 31.4%                 | 47.1%                               | 51.89      | 26.54            |
| Transplant             | 31.4%                 | 47.1%                               | 51.89      | 26.54            |
| Transplant Maintenance | 31.4%                 | 47.1%                               | 51.89      | 26.54            |
| Hemodialysis           | 40.2%                 | 58.6%                               | 51.89      | 21.08            |
| Peritoneal Dialysis    | 40.2%                 | 58.6%                               | 51.89      | 21.08            |

**Abbreviations:** CKD = chronic kidney disease; CFPB = Consumer Financial Protection Bureau; FACIT = Functional Assessment of Chronic Illness Therapy.

**Source:** AstraZeneca Data on File;<sup>S39</sup> PACE-CKD<sup>13</sup>



## Validation and Calibration Targets

Supplemental Table S36: Targets for model calibration and external validation

| Parameter                                                 | Validation Target (per million or as %) | Calibrated Model Output (per million or as %) | Validation Source         |
|-----------------------------------------------------------|-----------------------------------------|-----------------------------------------------|---------------------------|
| <b>Baseline Characteristics</b>                           |                                         |                                               |                           |
| % Female in Total Population                              | 50.60                                   | 50.59                                         | UK ONS <sup>14</sup>      |
| Average age of Total Population (years)                   | 40.30                                   | 40.61                                         |                           |
| <b>Proportion of patients with diabetes</b>               |                                         |                                               |                           |
| % of CKD Stage 1 patients with diabetes at baseline       | 18.48                                   | 18.41                                         | USRDS 2022 <sup>S40</sup> |
| % of CKD Stage 2 patients with diabetes at baseline       | 24.00                                   | 24.07                                         |                           |
| % of CKD Stage 3a patients with diabetes at baseline      | 26.32                                   | 26.38                                         |                           |
| % of CKD Stage 3b patients with diabetes at baseline      | 26.32                                   | 26.21                                         |                           |
| % of CKD Stage 4 patients with diabetes at baseline       | 43.04                                   | 43.33                                         |                           |
| % of CKD Stage 5 patients with diabetes at baseline       | 43.04                                   | 42.52                                         |                           |
| <b>Proportion of patients with hypertension</b>           |                                         |                                               |                           |
| % of CKD Stage 1 patients with hypertension at baseline   | 35.80                                   | 35.71                                         | USRDS 2022 <sup>S40</sup> |
| % of CKD Stage 2 patients with hypertension at baseline   | 48.10                                   | 48.01                                         |                           |
| % of CKD Stage 3a patients with hypertension at baseline  | 59.90                                   | 59.94                                         |                           |
| % of CKD Stage 3b patients with hypertension at baseline  | 59.90                                   | 59.85                                         |                           |
| % of CKD Stage 4 patients with hypertension at baseline   | 84.10                                   | 84.29                                         |                           |
| % of CKD Stage 5 patients with hypertension at baseline   | 84.10                                   | 84.49                                         |                           |
| <b>Proportion of patients with heart failure</b>          |                                         |                                               |                           |
| % of CKD Stage 1 patients with heart failure at baseline  | 4.40                                    | 4.37                                          | USRDS 2022 <sup>S40</sup> |
| % of CKD Stage 2 patients with heart failure at baseline  | 4.40                                    | 4.43                                          |                           |
| % of CKD Stage 3a patients with heart failure at baseline | 5.80                                    | 5.79                                          |                           |
| % of CKD Stage 3b patients with heart failure at baseline | 5.80                                    | 5.88                                          |                           |
| % of CKD Stage 4 patients with heart failure at baseline  | 8.20                                    | 7.99                                          |                           |
| % of CKD Stage 5 patients with heart failure at baseline  | 8.20                                    | 8.00                                          |                           |

| Parameter                                                    | Validation Target (per million or as %) | Calibrated Model Output (per million or as %) | Validation Source              |
|--------------------------------------------------------------|-----------------------------------------|-----------------------------------------------|--------------------------------|
| <b>Proportion of patients with prior MI</b>                  |                                         |                                               |                                |
| % of patients with CKD with prior MI at baseline (total)     | NA                                      | 7.90                                          | USRDS 2022 <sup>S40</sup>      |
| % of CKD Stage 1 patients with prior MI at baseline          | 7.80                                    | 7.74                                          |                                |
| % of CKD Stage 2 patients with prior MI at baseline          | 7.80                                    | 7.83                                          |                                |
| % of CKD Stage 3a patients with prior MI at baseline         | 7.80                                    | 7.85                                          |                                |
| % of CKD Stage 3b patients with prior MI at baseline         | 7.80                                    | 7.81                                          |                                |
| % of CKD Stage 4 patients with prior MI at baseline          | 11.40                                   | 10.70                                         |                                |
| % of CKD Stage 5 patients with prior MI at baseline          | 11.40                                   | 10.93                                         |                                |
| <b>Proportion of patients with prior stroke</b>              |                                         |                                               |                                |
| % of patients with CKD with prior stroke at baseline (total) | NA                                      | 6.01                                          | USRDS 2022 <sup>S40</sup>      |
| % of CKD Stage 1 patients with prior stroke at baseline      | 5.95                                    | 5.84                                          |                                |
| % of CKD Stage 2 patients with prior stroke at baseline      | 5.95                                    | 5.97                                          |                                |
| % of CKD Stage 3a patients with prior stroke at baseline     | 5.95                                    | 6.12                                          |                                |
| % of CKD Stage 3b patients with prior stroke at baseline     | 5.95                                    | 6.09                                          |                                |
| % of CKD Stage 4 patients with prior stroke at baseline      | 7.30                                    | 6.43                                          |                                |
| % of CKD Stage 5 patients with prior stroke at baseline      | 7.30                                    | 6.89                                          |                                |
| <b>Proportion of patients with CKD in total population</b>   |                                         |                                               |                                |
| % of patients with CKD of total population at baseline       | 13.9%                                   | 12.35%                                        | Hounkpatin 2020 <sup>S18</sup> |
|                                                              | 18.2%                                   |                                               | Hirst 2020 <sup>5</sup>        |
| % of CKD Stage 1 patients of total population at baseline    | 3.99%                                   | 3.62%                                         | HSE 2016 <sup>16</sup>         |
| % of CKD Stage 2 patients of total population at baseline    | 3.67%                                   | 3.45%                                         |                                |
| % of CKD Stage 3a patients of total population at baseline   | 4.86%                                   | 2.46%                                         |                                |
| % of CKD Stage 3b patients of total population at baseline   |                                         | 2.43%                                         |                                |
| % of CKD Stage 4 patients of total population at baseline    | 0.2%                                    | 0.15%                                         |                                |
| % of CKD Stage 5 patients of total population at baseline    |                                         | 0.24%                                         |                                |

| Parameter                                              | Validation Target (per million or as %) | Calibrated Model Output (per million or as %) | Validation Source      |
|--------------------------------------------------------|-----------------------------------------|-----------------------------------------------|------------------------|
| <b><i>Proportion of patients with CKD by stage</i></b> |                                         |                                               |                        |
| % of CKD Stage 1 patients at baseline                  | 31.30%                                  | 29.29%                                        | HSE 2016 <sup>16</sup> |
| % of CKD Stage 2 patients at baseline                  | 28.80%                                  | 27.95%                                        |                        |
| % of CKD Stage 3a patients at baseline                 | 38.20%                                  | 19.90%                                        |                        |
| % of CKD Stage 3b patients at baseline                 |                                         | 19.69%                                        |                        |
| % of CKD Stage 4 patients at baseline                  | 1.60%                                   | 1.20%                                         |                        |
| % of CKD Stage 5 patients at baseline                  |                                         | 1.96%                                         |                        |

**Abbreviations:** CKD = chronic kidney disease; HSE = Health Survey of England; MI = myocardial infarction; ONS = Office for National Statistics; USRDS = United States Renal Database System; UK = United Kingdom.

## UK Case Study Results

**Supplemental Table S37: IMPACT CKD predictions for change from baseline (2022) to 2032 for clinical, economic, patient, societal, and environmental burdens**

| Category                                                                        | 2022       | 2032       | Percent Change |
|---------------------------------------------------------------------------------|------------|------------|----------------|
| Number of people in UK                                                          | 67 000 000 | 70 455 459 | 5.2%           |
| <b>CKD prevalence</b>                                                           |            |            |                |
| Number of patients with CKD                                                     | 8 274 768  | 8 910 196  | 7.7%           |
| Number of patients with CKD stage 3-5 (including dialysis)                      | 3 538 069  | 4 304 750  | 21.7%          |
| Number of patients with diagnosed CKD                                           | 2 394 915  | 2 968 636  | 24.0%          |
| <b>RRT prevalence</b>                                                           |            |            |                |
| Number of patients receiving RRT                                                | 73 365     | 121 940    | 66.2%          |
| Number of patients undergoing dialysis                                          | 33 098     | 58 022     | 75.3%          |
| Number of post-transplant patients                                              | 40 267     | 63 918     | 58.7%          |
| <b>Cost of CKD</b>                                                              |            |            |                |
| Annual cost of CKD <sup>a</sup>                                                 | £1.90 B    | £2.45 B    | 29.6%          |
| Annual cost of CKD stage 3                                                      | £1.52 B    | £1.80 B    | 18.6%          |
| <b>Cost of RRT</b>                                                              |            |            |                |
| Annual cost of RRT                                                              | £1.09 B    | £1.95 B    | 78.0%          |
| Annual cost of dialysis                                                         | £0.84 B    | £1.47 B    | 75.0%          |
| Annual cost of transplant                                                       | £0.26 B    | £0.48 B    | 88.0%          |
| <b>Patient burden</b>                                                           |            |            |                |
| Cumulative lost income (over 10 years)                                          | -          | £49 B      | -              |
| <b>Societal burden</b>                                                          |            |            |                |
| Cumulative missed workdays for patients with CKD and caregivers (over 10 years) | -          | 362 M      | -              |
| Lost FTEs (over 10 years)                                                       | -          | 1.8 M      | -              |

| Category                                          | 2022        | 2032        | Percent Change |
|---------------------------------------------------|-------------|-------------|----------------|
| <b>Environmental burden</b>                       |             |             |                |
| Freshwater consumption (m <sup>3</sup> )          | 1 697 846   | 2 998 381   | 76.6%          |
| Fossil fuel depletion (kg oil eq.)                | 89 325 070  | 156 199 780 | 74.9%          |
| Overall carbon footprint (kg CO <sub>2</sub> eq.) | 200 800,206 | 351 587 324 | 75.1%          |

<sup>a</sup> Excludes costs associated with RRT.

Abbreviations: CKD = chronic kidney disease; eq. = equivalent; FTE = full-time equivalent; RRT = renal replacement therapy; UK = United Kingdom.

## Supplementary References

- S1. Chan CT, Blankestijn PJ, Dember LM, et al. Dialysis initiation, modality choice, access, and prescription: conclusions from a Kidney Disease: Improving Global Outcomes (KDIGO) Controversies Conference. *Kidney Int.* Jul 2019;96(1):37-47. doi:10.1016/j.kint.2019.01.017
- S2. Sawhney S, Bell S, Black C, et al. Harmonization of epidemiology of acute kidney injury and acute kidney disease produces comparable findings across four geographic populations. *Kidney Int.* Jun 2022;101(6):1271-1281. doi:10.1016/j.kint.2022.02.033
- S3. Lawson CA, Zaccardi F, Squire I, et al. 20-year trends in cause-specific heart failure outcomes by sex, socioeconomic status, and place of diagnosis: a population-based study. *Lancet Public Health.* Aug 2019;4(8):e406-e420. doi:10.1016/S2468-2667(19)30108-2
- S4. United States Renal Data System. *Annual Data Report: Atlas of Chronic Kidney Disease and End-Stage Renal Disease in the United States.* 2009. Accessed August 2023. <https://www.niddk.nih.gov/about-niddk/strategic-plans-reports/usrds/prior-data-reports>
- S5. Masson P, Webster AC, Hong M, Turner R, Lindley RI, Craig JC. Chronic kidney disease and the risk of stroke: a systematic review and meta-analysis. *Nephrol Dial Transplant.* Jul 2015;30(7):1162-9. doi:10.1093/ndt/gfv00
- S6. Grams ME, Sang Y, Ballew SH, et al. A Meta-analysis of the Association of Estimated GFR, Albuminuria, Age, Race, and Sex With Acute Kidney Injury. *Am J Kidney Dis.* Oct 2015;66(4):591-601. doi:10.1053/j.ajkd.2015.02.337
- S7. Bansal N, Zelnick L, Bhat Z, et al. Burden and Outcomes of Heart Failure Hospitalizations in Adults With Chronic Kidney Disease. *J Am Coll Cardiol.* Jun 4 2019;73(21):2691-2700. doi:10.1016/j.jacc.2019.02.071
- S8. Duarte TTP, Magro MCS. Recovery of Renal Function in Clinical Patients with Acute Kidney Injury: Impact on Mortality. *Life (Basel).* Jun 8 2022;12(6):852. doi:10.3390/life12060852
- S9. Levey AS, de Jong PE, Coresh J, et al. The definition, classification, and prognosis of chronic kidney disease: a KDIGO Controversies Conference report. *Kidney Int.* Jul 2011;80(1):17-28. doi:10.1038/ki.2010.483
- S10. Moist LM, Fenton S, Kim JS, et al. Canadian Organ Replacement Register (CORR): reflecting the past and embracing the future. *Can J Kidney Health Dis.* 2014;1:26. doi:10.1186/s40697-014-0026-5
- S11. Robinson BM, Zhang J, Morgenstern H, et al. Worldwide, mortality risk is high soon after initiation of hemodialysis. *Kidney Int.* Jan 2014;85(1):158-65. doi:10.1038/ki.2013.252
- S12. Asaria P, Bennett JE, Elliott P, et al. Contributions of event rates, pre-hospital deaths, and deaths following hospitalisation to variations in myocardial infarction mortality in 326 districts in England: a spatial analysis of linked hospitalisation and mortality data. *Lancet Public Health.* Oct 2022;7(10):e813-e824. doi:10.1016/S2468-2667(22)00108-6
- S13. Think Kidneys. *Reporting the rate of Acute Kidney Injury (AKI) within England – the current state of the NHS AKI Master Patient Index and Registry.* 2018. Accessed August 2023. <https://www.thinkkidneys.nhs.uk/aki/wp-content/uploads/sites/2/2018/03/Reporting-the-rate-of-AKI-January-2018.pdf>
- S14. Taylor CJ, Ordonez-Mena JM, Jones NR, et al. National trends in heart failure mortality in men and women, United Kingdom, 2000-2017. *Eur J Heart Fail.* Jan 2021;23(1):3-12. doi:10.1002/ejhf.1996
- S15. Zghebi SS, Steinke DT, Carr MJ, Rutter MK, Emsley RA, Ashcroft DM. Examining trends in type 2 diabetes incidence, prevalence and mortality in the UK between 2004 and 2014. *Diabetes, Obesity and Metabolism.* 2017;19(11):1537-1545.
- S16. Dannenberg AL, Garrison RJ, Kannel WB. Incidence of hypertension in the Framingham Study. *Am J Public Health.* Jun 1988;78(6):676-9. doi:10.2105/ajph.78.6.676
- S17. Lin E, Chertow GM, Yan B, Malcolm E, Goldhaber-Fiebert JD. Cost-effectiveness of multidisciplinary care in mild to moderate chronic kidney disease in the United States: A modeling study. *PLoS Med.* Mar 2018;15(3):e1002532. doi:10.1371/journal.pmed.1002532

- S18. Hounkpatin HO, Harris S, Fraser SDS, et al. Prevalence of chronic kidney disease in adults in England: comparison of nationally representative cross-sectional surveys from 2003 to 2016. *BMJ Open*. Aug 13 2020;10(8):e038423. doi:10.1136/bmjopen-2020-038423
- S19. AstraZeneca Data on File. DAPA-CKD. 2021;
- S20. McEwan P, Darlington O, Miller R, et al. Cost-effectiveness of dapagliflozin as a treatment for chronic kidney disease: A health-economic analysis of DAPA-CKD. *Clinical Journal of the American Society of Nephrology*. 2022;17(12):1730-1741.
- S21. Kerr M, Bray B, Medcalf J, O'Donoghue DJ, Matthews B. Estimating the financial cost of chronic kidney disease to the NHS in England. *Nephrol Dial Transplant*. Oct 2012;27 Suppl 3(Suppl 3):iii73-80. doi:10.1093/ndt/gfs269
- S22. NHS Improvement. *Healthcare costing standards for England Acute: Costing methods*. 2019. [https://www.england.nhs.uk/wp-content/uploads/2020/08/Acute\\_CMs\\_standards20.pdf](https://www.england.nhs.uk/wp-content/uploads/2020/08/Acute_CMs_standards20.pdf)
- S23. NHS England. National Cost Collection 2019. NHS England and NHS Improvement. [https://www.england.nhs.uk/wp-content ...](https://www.england.nhs.uk/wp-content/...); 2020.
- S24. NHS England. *Service Specifications*. 2017. <https://www.england.nhs.uk/wp-content/uploads/2017/05/service-spec-adult-kidney-transplant-service.pdf>
- S25. Danese MD, Gleeson M, Kutikova L, et al. Estimating the economic burden of cardiovascular events in patients receiving lipid-modifying therapy in the UK. *BMJ Open*. Aug 5 2016;6(8):e011805. doi:10.1136/bmjopen-2016-011805
- S26. Luengo-Fernandez R, Violato M, Candio P, Leal J. Economic burden of stroke across Europe: A population-based cost analysis. *Eur Stroke J*. Mar 2020;5(1):17-25. doi:10.1177/2396987319883160
- S27. Kolhe NV, Eldehni MT, Selby NM, McIntyre CW. The reimbursement and cost of acute kidney injury: a UK hospital perspective. *Nephron Clin Pract*. 2014;126(1):51-6. doi:10.1159/000358435
- S28. Osenenko KM, Kuti E, Deighton AM, Pimple P, Szabo SM. Burden of hospitalization for heart failure in the United States: a systematic literature review. *J Manag Care Spec Pharm*. Feb 2022;28(2):157-167. doi:10.18553/jmcp.2022.28.2.157
- S29. Cooper JT, Lloyd A, Sanchez JJG, Sörstadius E, Briggs A, McFarlane P. Health related quality of life utility weights for economic evaluation through different stages of chronic kidney disease: a systematic literature review. *Health and Quality of Life Outcomes*. 2020;18:1-11.
- S30. Sullivan PW, Ghushchyan V. Preference-Based EQ-5D index scores for chronic conditions in the United States. *Med Decis Making*. Jul-Aug 2006;26(4):410-20. doi:10.1177/0272989X06290495
- S31. Perera R, Stevens R, Aronson JK, et al. Long-term monitoring in primary care for chronic kidney disease and chronic heart failure: a multi-method research programme. *Programme Grants for Applied Research*. 2021;9(10):1-218.
- S32. Di Tanna GL, Urbich M, Wirtz HS, et al. Health State Utilities of Patients with Heart Failure: A Systematic Literature Review. *Pharmacoeconomics*. Feb 2021;39(2):211-229. doi:10.1007/s40273-020-00984-6
- S33. van Haalen H, Jackson J, Spinowitz B, Milligan G, Moon R (2020) Impact of chronic kidney disease and anemia on health-related quality of life and work productivity: analysis of multinational real-world data. *BMC Nephrol* 21 (1): 88.
- S34. Eriksson D, Karlsson L, Eklund O, et al. Real-world costs of autosomal dominant polycystic kidney disease in the Nordics. *BMC health services research*. 2017;17(1):1-9.
- S35. Employee earnings in the UK: 2022 (2022).
- S36. Organization for Economic Co-operation and Development. OECD Data: GDP per hour worked. Accessed August 2023. <https://data.oecd.org/lprdy/gdp-per-hour-worked.htm>
- S37. Organisation for Economic Co-operation and Development. *Taxing Wages 2023*. 2023. 2023. Accessed 2023-Sep-29. <https://www.oecd.org/tax/tax-policy/taxing-wages-brochure.pdf>
- S38. AstraZeneca Data on File. Environmental burden by stage and treatment modality. 2023;
- S39. AstraZeneca Data on File. Lifestyle Impairment and Financial Status by CKD stage. 2023;
- S40. United States Renal Data System. *2022 USRDS Annual Data Report: Epidemiology of kidney disease in the United States*. 2022. <https://adr.usrds.org/2022>
